# Supplementary material
Source: publisher figshare collection journal article supplement (https://plos.figshare.com/articles/dataset/_/3948957)
Supplement: Supplementary file 1 [file 1]

Archive with 4 entries (4 files):
- S1 File.PDF
- S1 Table.PDF
- S2 Table.PDF
- S3 Table.PDF
