# Supplementary material
Source: publisher figshare collection journal article supplement (https://plos.figshare.com/articles/dataset/_/3948957)
Supplement: Supplementary file 1 [file 1 › S1 Table.PDF]

**S1 Table. List of ISSP member countries of the 2010 data**

- (A) The ISSP member countries included in the current study: Australia, Belgium, Bulgaria, Chile, China, Croatia, Czech Republic, Denmark, Finland, France, Germany, Israel, Italy, South Korea, Lithuania, Netherlands, Philippines, Poland, Portugal, Russia, Slovak Republic, Slovenia, Spain, Sweden, Switzerland, Taiwan, Turkey, Great Britain, United States.**
- (B) Countries excluded from the current study: Japan, Norway, South Africa.**
