# Supplementary material
Source: publisher figshare collection journal article supplement (https://plos.figshare.com/articles/dataset/_/3948957)
Supplement: Supplementary file 1 [file 1 › S2 Table.PDF]

## **S2 Table. The SPSS syntax used for ordinal logistic regression**

The syntax used in 28 countries is shown below:

```
GET  
  
FILE='L:\HAPPY_SPSS\01_W_8days.sav'.  
  
DATASET NAME DataSet1 WINDOW=FRONT.  
  
PLUM V5 BY V59 V42 V55 V56 V57 V58 SEX GDP WITH TEMP DEWP VISIB WDSP city_z_new AGE  
  
/CRITERIA=CIN(95) DELTA(0) LCONVERGE(0) MXITER(100) MXSTEP(5) PCONVERGE(1.0E-6)  
SINGULAR(1.0E-8)  
  
/LINK=LOGIT  
  
/PRINT=FIT PARAMETER SUMMARY.
```

The syntax used in China is shown below:

```
GET  
  
FILE='L:\HAPPY_SPSS\04_C_8days.sav'.  
  
DATASET NAME DataSet1 WINDOW=FRONT.  
  
PLUM CN_V5 BY V59 V42 V55 V56 V57 V58 SEX WITH TEMP DEWP VISIB WDSP city_z_new AGE  
  
/CRITERIA=CIN(95) DELTA(0) LCONVERGE(0) MXITER(100) MXSTEP(5) PCONVERGE(1.0E-6)  
SINGULAR(1.0E-8)  
  
/LINK=LOGIT  
  
/PRINT=FIT PARAMETER SUMMARY.
```

The meaning of the related variables listed in the following S2 Table 1.

| S2 Table 1. The variables in the query strings |                                 |
|------------------------------------------------|---------------------------------|
| Variables                                      | Description                     |
| V5                                             | How happy or unhappy            |
| CN_V5                                          | How happy or unhappy (In China) |
| V59                                            | Health status                   |
| V42                                            | Past 12 months: visit a doctor  |
| V55                                            | Smoking cigarettes              |
| V56                                            | Drinks alcohol                  |
| V57                                            | Physical activity               |
| V58                                            | Eats fresh fruits or vegetables |
| SEX                                            | Gender                          |
| GDP                                            | Gross Domestic Product          |
| TEMP                                           | Temperature (°F)                |
| DEWP                                           | Dew point (°F)                  |
| VISIB                                          | Visibility (miles)              |
| WDSP                                           | Wind speed (knots)              |
| city_z_new                                     | City elevation (hectometers)    |
| AGE                                            | Age (years)                     |
