# Supplementary material
Source: publisher figshare collection journal article supplement (https://plos.figshare.com/articles/dataset/_/3948957)
Supplement: Supplementary file 1 [file 1 › S3 Table.PDF]

**S3 Table. Number of countries in this study and in the UN data**

| Regions            | Num. of countries<br>in survey data <sup>1</sup> | Total countries in<br>the UN data <sup>2</sup> | Percentage |
|--------------------|--------------------------------------------------|------------------------------------------------|------------|
| South America      | 1                                                | 14                                             | 7.1        |
| Oceania            | 1                                                | 25                                             | 4          |
| Northern America   | 1                                                | 5                                              | 20         |
| Eastern Asia       | 2                                                | 7                                              | 28.6       |
| South-Eastern Asia | 1                                                | 11                                             | 9.1        |
| Southern Europe    | 5                                                | 16                                             | 31.3       |
| Western Asia       | 2                                                | 18                                             | 11.1       |
| Eastern Europe     | 5                                                | 10                                             | 50         |
| Northern Europe    | 5                                                | 18                                             | 27.8       |
| Western Europe     | 5                                                | 9                                              | 55.6       |

Sources: 1.<http://www.issp.org>;

2.<http://unstats.un.org/unsd/methods/m49/m49regin.htm>.
